# Supplementary material for: Newfangled Topical Film-Forming Solution for Facilitated Antifungal Therapy: Design, Development, Characterization, and In Vitro Evaluation
Source: MDPI journal article supplement (doi:10.3390/polym15041003), 2023-02-17
Supplement: s1 [file s1]

## Supplementary Data

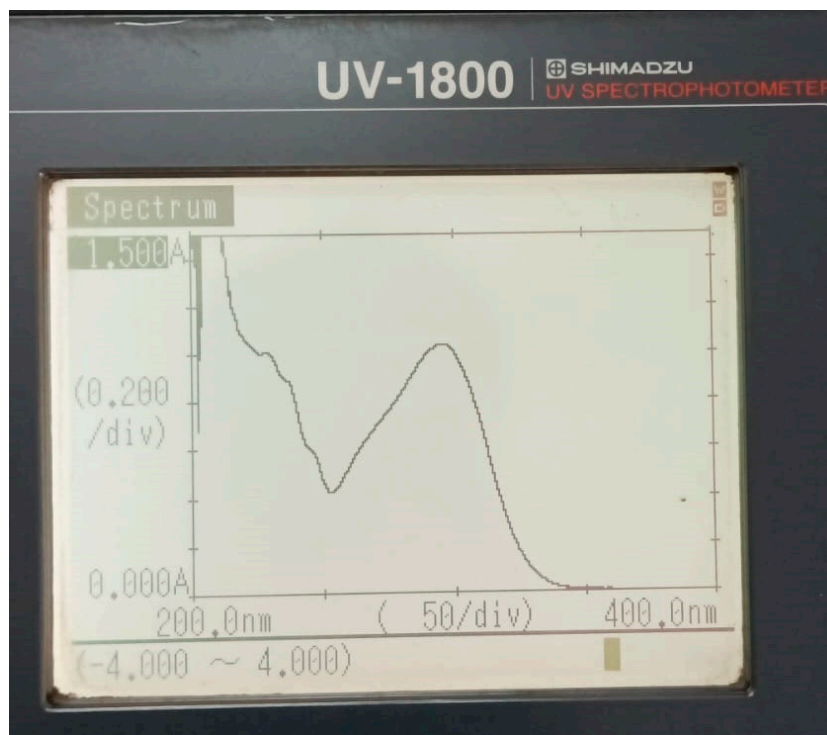

**Supplementary Figure S1:** UV spectrum and lambda max of LCZ pure drug.

**Supplementary Table S1:** Concentration and absorbances of LCZ pure drug *via* UV spectrophotometry.

| Concentration of LCZ<br>( $\mu\text{g/mL}$ ) | Absorbance at 290 nm |
|----------------------------------------------|----------------------|
| 0                                            | 0                    |
| 5                                            | $0.112 \pm 0.01$     |
| 10                                           | $0.223 \pm 0.04$     |
| 15                                           | $0.357 \pm 0.031$    |
| 20                                           | $0.481 \pm 0.02$     |
| 25                                           | $0.571 \pm 0.05$     |
| 30                                           | $0.693 \pm 0.08$     |

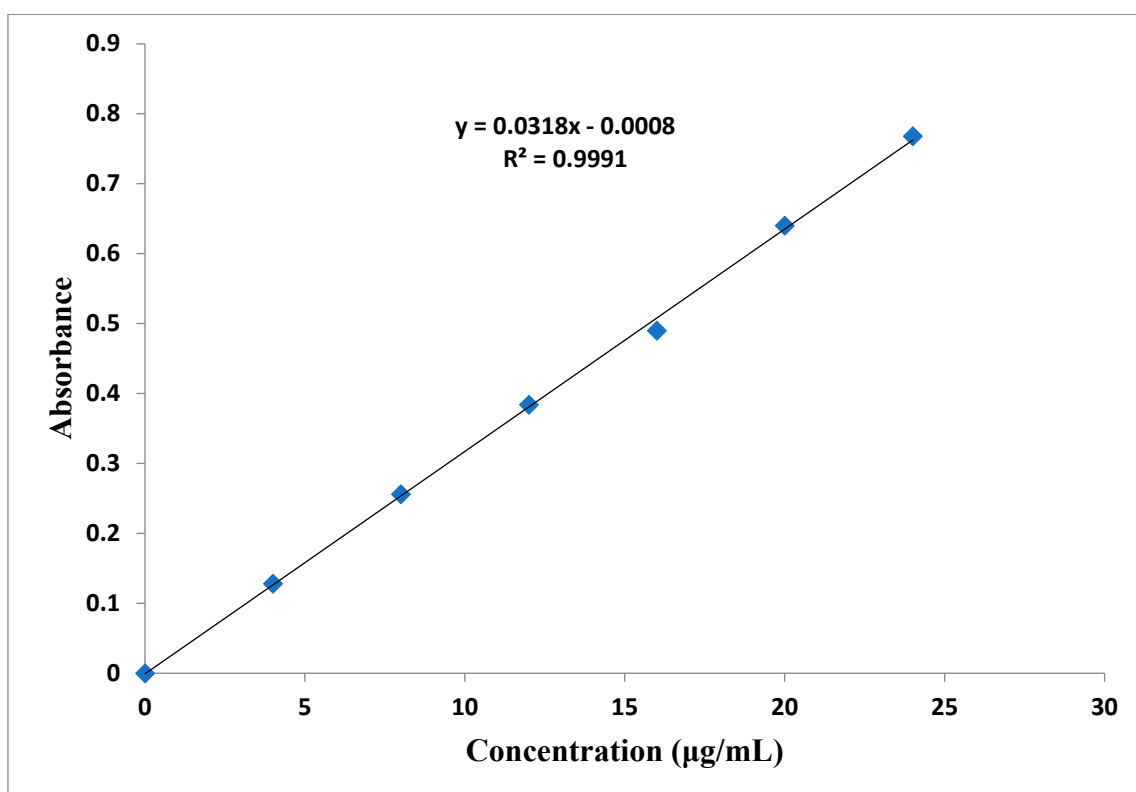

**Supplementary Figure S2:** Calibration curve of LCZ pure drug *via* UV spectrophotometry.

**Supplementary Table S2:** Final composition and/or formula for the optimized formulation F-14.

| Eudragit RS-100 (%) | Propylene Glycol (%) | Sodium bi-carbonate (%) | Ethanol (ml) | Luliconazole (%) |
|---------------------|----------------------|-------------------------|--------------|------------------|
| 22%                 | 1.5%                 | 0.25%                   | 10           | 1%               |

**Supplementary Table S3:** In vitro drug diffusion study results of optimized film forming solution F-14.

| Time (min)                   | 0 | 1    | 2    | 3    | 4    | 5    | 10    | 15    | 30    | 60    | 120   | 180   | 240   | 300   | 360  | 420  |
|------------------------------|---|------|------|------|------|------|-------|-------|-------|-------|-------|-------|-------|-------|------|------|
| Cumulative drug diffused (%) | 0 | 0.34 | 2.77 | 3.66 | 5.58 | 8.24 | 12.58 | 18.04 | 24.96 | 33.36 | 42.07 | 51.93 | 63.33 | 74.83 | 86.3 | 98.0 |

**Supplementary Table S4:** Stability studies data of the optimized polymeric FFS F-14.

| Time (Days) | Viscosity* (cP) | Drying time* (sec) | pH*    | Cumulative drug diffused* (%) |
|-------------|-----------------|--------------------|--------|-------------------------------|
| 0           | 14 ±0.01        | 60±02              | 8±0.03 | 98.48±0.2                     |
| 7           | 14 ±0.02        | 60±02              | 8±0.02 | 98.07±0.2                     |
| 14          | 13±0.02         | 65±04              | 8±0.03 | 97.79±0.6                     |
| 21          | 14±0.01         | 60±02              | 8±0.01 | 97.55±0.3                     |
| 28          | 13±0.02         | 63±01              | 8±0.02 | 97.18±0.2                     |

\*Mean ± SD, (n = 3)
